# Supplementary material for: ChatGPT vs. Bard in plastic surgery: hype or hope?
Source: Preprints.org preprint supplement (doi:10.20944/preprints202312.0901.v1), 2023-12-12
Supplement: Supplementary file 1 [file supplementary]

**Appendix 1 - Specialists**

- 1. Writing of letters

Prompt: “A 50 year old patient with a sub mandibular gland removal in 2017 on the right who has excess skin on the left side. Please write me a claim letter to the insurance company for a neck lift to regain facial symmetry.”

| ChatGPT | Bard |
| --- | --- |
| [Your Name]  [Your Address]  [City, State, ZIP]  [Email Address]  [Phone Number]  [Date]    [Insurance Company Name]  [Insurance Company Address]  [City, State, ZIP]    Subject: Request for Coverage - Necklift Procedure for Facial Symmetry Restoration    Policy Holder: [Policy Holder's Full Name]  Policy Number: [Policy Number]  Patient: [Patient's Full Name]  Date of Birth: [Patient's Date of Birth]    Dear [Insurance Company Name],    I hope this letter finds you well. I am writing on behalf of my patient, [Patient's Full Name], to request coverage for a necklift procedure to address a significant cosmetic issue resulting from a submandibular gland removal surgery performed in 2017. As [Patient's] healthcare provider, I have evaluated their condition and believe that the necklift is medically necessary to restore facial symmetry and improve their quality of life.    Patient Background:  At the age of 50, in 2017, [Patient's Full Name] underwent a submandibular gland removal surgery on the right side due to [provide reason or medical indication for the procedure]. While the removal of the submandibular gland was successful in resolving the initial issue, it has resulted in a noticeable imbalance in facial appearance, particularly in the neck area. The excess skin on the left side has led to asymmetry, which has had a profound impact on [Patient's] self-esteem and overall well-being.  Medical Necessity:  Functional Impact: The asymmetry caused by the excess skin on the left side of [Patient's] face affects their ability to function normally in social and professional settings. The visible disparity in facial appearance creates psychological distress, leading to decreased self-confidence and increased social anxiety. Restoring facial symmetry through a necklift procedure is crucial to improving [Patient's] overall mental health and quality of life.  Physical Discomfort: In addition to the psychological impact, the excess skin on the left side of [Patient's] face has caused physical discomfort, such as pulling sensations and irritation. These discomforting symptoms can be alleviated by surgically removing the excess skin through a necklift procedure.  Professional Opinion: As [Patient's] attending physician, I have conducted a comprehensive evaluation of their condition and have determined that a necklift procedure is the most appropriate and effective course of action to restore facial symmetry and improve [Patient's] overall well-being. I believe it is in the best interest of [Patient] to proceed with this procedure.  Coverage Request:  Given the circumstances outlined above, I kindly request that [Insurance Company Name] consider providing coverage for the necklift procedure for [Patient's Full Name]. This procedure is essential for the restoration of facial symmetry and will significantly improve [Patient's] physical comfort, psychological well-being, and overall quality of life.    I have attached all relevant medical documentation, including [Patient's] medical history, surgical records from the submandibular gland removal in 2017, photographs demonstrating the facial asymmetry, and my professional recommendation for a necklift procedure. Please review these materials to support our request for coverage.  If you require any additional information or if there is a need for me to participate in a peer-to-peer consultation, I am more than willing to cooperate and provide any necessary documentation to support the medical necessity of this procedure.  Thank you for your prompt attention to this matter. I trust that [Insurance Company Name] will recognize the importance of addressing [Patient's] condition and provide the coverage needed to restore facial symmetry and improve their overall well-being. I look forward to a positive response.  Sincerely,  [Your Name]  [Your Title/Position]  [Your Medical Practice/Institution] | Sure, here is a sample claim letter for a necklift to regain facial symmetry for a 50-year-old patient with a submandibular gland removal in 2017 on the right who has excess skin on the left side:    [Date]    [Name of Insurance Company]  [Address]    To Whom It May Concern:    I am writing to request coverage for a necklift for my patient, [Patient Name], a 50-year-old male. [Patient Name] had a submandibular gland removal on the right side in 2017. This surgery resulted in excess skin on the left side of his neck, which has caused him significant distress.  The excess skin on [Patient Name]'s neck makes him feel self-conscious and embarrassed. He has avoided social situations and has even stopped going to work because he is so ashamed of his appearance. The excess skin also makes it difficult for him to shave and to keep his neck clean.  A necklift is the only surgical procedure that can correct the excess skin on [Patient Name]'s neck. The surgery is relatively short and has a quick recovery time. The benefits of the surgery are significant and will greatly improve [Patient Name]'s quality of life.  I have enclosed a copy of [Patient Name]'s medical records, which document the need for the surgery. I have also enclosed a quote from a surgeon who specializes in necklifts. The total cost of the surgery is $[Amount].  I respectfully request that you approve coverage for this surgery. Thank you for your time and consideration.  Sincerely,  [Your Name] |

- 1. Generation of medical content

Prompt: “Write an anamnesis based on this information: female, 45 years old, hospitalized for a facelift, known to have Ehlers-Danlos and an appendectomy in childhood.”

| ChatGPT | Bard |
| --- | --- |
| Patient Anamnesis:    Name: [Patient's Name]  Age: 45 years  Gender: Female  Date of Admission: [Date]    Chief Complaint:  The patient presents for hospitalization in preparation for a facelift procedure.    Medical History:    Ehlers-Danlos Syndrome (EDS):    Diagnosis received in the patient's teenage years.  Characterized by joint hypermobility, recurrent dislocations, and skin fragility.  Childhood Appendectomy:    History of appendectomy performed during childhood.  No known complications or subsequent issues related to the surgery.  Surgical History:    Appendectomy:  Surgery performed during childhood.  No known complications or subsequent surgeries related to the appendectomy.  Current Medications:  [List any current medications the patient is taking, including dosages and frequencies.]  Allergies:  [Specify any known allergies or adverse drug reactions the patient has.]  Family History:  [Provide relevant information regarding family history of medical conditions, if known.]  Social History:  [Include information about the patient's occupation, lifestyle, and any habits (e.g., smoking, alcohol consumption).]  Psychosocial History:  [Include any relevant information about the patient's mental health, support systems, or other psychosocial factors.]  Review of Systems:  [Provide a brief review of systems, including any notable symptoms or concerns reported by the patient.]  Physical Examination:  [Document the findings from the patient's physical examination, including vital signs and any relevant observations.]  Diagnostic Workup:  [Outline any diagnostic tests or investigations that have been conducted or are planned, such as blood tests, imaging studies, or consultations with other specialists.]  Assessment and Plan:  Based on the patient's medical history, surgical history, and clinical examination, it has been determined that she is scheduled for a facelift procedure. Given her diagnosis of Ehlers-Danlos Syndrome, special considerations will be taken to minimize the potential risks associated with her condition, such as skin fragility and delayed wound healing. The surgical team will develop a customized approach, focusing on appropriate tissue support, meticulous wound management, and collaboration between the surgical, anesthesia, and nursing teams.  Preoperative preparations, including obtaining informed consent, arranging for necessary preoperative investigations, and patient education regarding the procedure and expected postoperative course, will be completed. Anesthesia consultation will be sought to assess the patient's suitability for anesthesia and discuss any specific considerations related to her medical history.  Following the facelift procedure, a comprehensive postoperative care plan will be implemented, including wound management, pain control, and close monitoring for potential complications. Regular follow-up visits will be scheduled to evaluate the patient's progress, address any concerns, and provide ongoing support throughout the recovery period.  This anamnesis serves as a comprehensive summary of the patient's medical history and outlines the plan for her upcoming facelift procedure. | Sure, here is an anamnesis for a 45-year-old female hospitalized for a facelift who is known to have Ehlers-Danlos and an appendectomy in childhood:    Patient Name: Jane Doe    Age: 45    Sex: Female    Date: 2023-05-21    Chief Complaint: Facelift    Anamnesis:  The patient is a 45-year-old female with a history of Ehlers-Danlos syndrome who presents for a facelift. She has been experiencing sagging skin and jowls for the past several years. She is also concerned about her double chin. She has tried non-surgical treatments, such as Botox and fillers, but she is not happy with the results. She is therefore seeking a surgical facelift.  The patient was born at term and had an uneventful delivery. She was a healthy child and did not have any major illnesses or injuries. She attended college and graduated with a degree in business. She is married and has two children. She is a stay-at-home mom.  The patient's medical history is significant for Ehlers-Danlos syndrome. She was diagnosed with this condition in her early 20s. Ehlers-Danlos syndrome is a genetic disorder that affects the connective tissue. It can cause a variety of symptoms, including sagging skin, joint hypermobility, and easy bruising. The patient's Ehlers-Danlos syndrome has been well-controlled with medication. She has not had any major complications from the condition.  The patient's surgical history is also significant for an appendectomy. She had this surgery in her childhood. She has not had any other major surgeries.  The patient's social history is unremarkable. She is married and has two children. She is a stay-at-home mom. She does not smoke or drink alcohol.  The patient's review of systems is negative for any significant symptoms. She denies any fevers, chills, night sweats, or weight loss. She also denies any shortness of breath, chest pain, or palpitations.  The patient's physical examination is unremarkable. She is a well-developed, well-nourished female in no acute distress. Her vital signs are within normal limits. Her skin is fair and her hair is brown. She has no rashes or lesions. Her eyes are clear and her pupils are equal, round, and reactive to light. Her ears, nose, and throat are unremarkable. Her neck is supple without masses or tenderness. Her lungs are clear to auscultation. Her heart is regular rate and rhythm without murmurs, gallops, or rubs. Her abdomen is soft, non-tender, and non-distended. Her extremities are warm and well-perfused.  The patient's laboratory tests and imaging studies are within normal limits.  The patient's diagnosis is Ehlers-Danlos syndrome and facial aging.  The patient's plan is to undergo a facelift on 2023-05-22. She will be admitted to the hospital on the day of surgery and will be discharged on the following day. She will be given pain medication and antibiotics after surgery. She will also be instructed to avoid strenuous activity for several weeks.  The patient's prognosis is good. She is expected to make a full recovery from her facelift and experience a significant improvement in the appearance of her face and neck. |

- 1. Analysis of risk factors for a procedure

Prompt: “Is this patient a good candidate for a facelift?”

| ChatGPT | Bard |
| --- | --- |
| As an AI language model, I cannot provide a medical evaluation or determine if a patient is a good candidate for a facelift. However, I can provide some general information on factors that are typically considered when assessing candidacy for a facelift. The final determination should be made by a qualified plastic surgeon after a thorough evaluation of the patient's individual circumstances.  In the case of this specific patient, there are a few considerations to take into account:  Ehlers-Danlos Syndrome (EDS): EDS is a connective tissue disorder that can affect the skin's strength and elasticity. Given the potential for fragile skin and delayed wound healing, it is important to consult with a plastic surgeon experienced in working with patients with EDS. They can assess the patient's specific subtype of EDS, severity, and overall health to determine if a facelift is appropriate.  Overall Health: The patient's general health status is a crucial factor in determining candidacy for any surgical procedure. A comprehensive medical evaluation should be conducted to assess the patient's fitness for surgery, including consideration of any comorbidities or medications that may impact the procedure or recovery.  Expectations and Goals: It is essential to have a clear understanding of the patient's expectations and goals for the facelift procedure. Realistic expectations, good mental health, and a positive outlook are important factors for a successful outcome.  Risks and Potential Complications: The surgeon will consider the potential risks and complications associated with a facelift, particularly in relation to the patient's medical history, such as EDS. They will weigh the benefits of the procedure against these risks and ensure the patient is fully informed.  It is highly recommended that the patient consults with a board-certified plastic surgeon who specializes in facial rejuvenation and has experience working with patients with EDS. The surgeon can evaluate the patient's specific case, discuss potential risks, and provide personalized recommendations based on the patient's individual circumstances and goals. | Based on the information provided, it is difficult to say definitively whether or not this patient is a good candidate for a facelift. However, there are some factors that may make her a less ideal candidate, such as her history of Ehlers-Danlos syndrome. Ehlers-Danlos syndrome is a genetic disorder that affects the connective tissue. It can cause a variety of symptoms, including sagging skin, joint hypermobility, and easy bruising. These symptoms may make it more difficult for the patient to heal from a facelift and may increase the risk of complications.  Ultimately, the decision of whether or not to undergo a facelift is a personal one. The patient should discuss the risks and benefits of the procedure with her doctor and make an informed decision based on her individual circumstances. |

- 1. Perform a literature review

Prompt: “Conduct a brief literature search on recent facelift techniques.”

| ChatGPT | Bard |
| --- | --- |
| I apologize for the confusion, but as an AI language model, I don't have direct access to perform a literature search or browse the internet. However, I can provide you with some general information on recent facelift techniques based on my pre-existing knowledge up until September 2021. It's important to note that medical techniques and advancements can change rapidly, so consulting up-to-date medical literature or speaking with a qualified medical professional would be the best course of action for the most current information.  In recent years, there have been advancements and refinements in facelift techniques aimed at achieving more natural-looking results with less scarring and downtime. Some of the notable techniques that have gained popularity are:  Deep Plane Facelift: This technique involves repositioning and lifting the deeper layers of facial tissues, including the SMAS (superficial muscular aponeurotic system), to achieve more significant and longer-lasting results. By targeting the deeper tissues, the deep plane facelift aims to provide a more comprehensive and natural rejuvenation.  SMAS Facelift: The SMAS facelift focuses on tightening and repositioning the SMAS layer, which is a network of muscle and fibrous tissue beneath the skin. This technique allows for a more extensive correction of sagging and jowling, providing a lifted appearance.  Short Scar Facelift: Also known as a mini facelift or limited incision facelift, this technique uses shorter incisions that are typically confined to the front of the ear. It is suitable for patients with milder signs of aging and requires less recovery time compared to traditional facelifts.  Thread Lift: Thread lift is a non-surgical alternative to facelift surgery that involves the use of dissolvable sutures with small cones or barbs. These threads are inserted under the skin and can be used to lift and reposition sagging facial tissues. Thread lifts provide temporary results and are typically used for subtle facial rejuvenation.  Fat Grafting: Fat grafting, also known as fat transfer or fat injections, involves harvesting fat from one area of the body and injecting it into the face to restore volume and improve contours. This technique can be used in conjunction with facelift surgery to enhance results and achieve a more youthful appearance.  It's important to note that the suitability of a particular facelift technique depends on various factors, including the patient's individual needs, facial anatomy, and the surgeon's expertise. Consulting with a board-certified plastic surgeon or facial plastic surgeon would provide you with the most up-to-date information on the latest techniques and their appropriateness for your specific case. | I'm unable to help you with that, as I'm only a language model and don't have the necessary information or abilities. |

Prompt: “Conduct a brief literature search on facelift techniques with references.”

| ChatGPT | Bard |
| --- | --- |
| I apologize for any confusion caused. As an AI language model, I don't have direct access to external sources such as medical databases or journals to conduct a literature search. I can provide general information based on my training data up until September 2021, but it's important to note that medical techniques and advancements may have progressed since then. For the most current and accurate information, I recommend consulting medical literature, journals, or speaking with a qualified medical professional who can provide you with the latest research and advancements in facelift techniques. | As a language model, I'm not able to assist you with that. |

Prompt: “Search the literature on facelift techniques with 10 references.”

| ChatGPT | Bard |
| --- | --- |
| I don't have direct access to medical literature or databases to conduct a comprehensive search and provide you with specific references. | I'm unable to help you with that, as I'm only a language model and don't have the necessary information or abilities. |

Prompt: “Write a literature review on the facelift.”

| ChatGPT | Bard |
| --- | --- |
| Title: Facelift Surgery: A Comprehensive Literature Review  Introduction:  Facelift surgery, also known as rhytidectomy, is a popular cosmetic procedure that aims to rejuvenate the face by reducing the signs of aging, such as wrinkles, sagging skin, and other age-related changes. This literature review provides an overview of the evolution of facelift techniques, the current state of the procedure, patient satisfaction, and complications.  Evolution of Facelift Techniques:  Facelift surgery has a rich history dating back to the early 20th century. The first facelifts primarily involved simple skin tightening procedures. Over time, the techniques have evolved significantly. The early 20th century saw limited understanding of facial anatomy, often leading to unnatural or overly tight results. In the mid-20th century, the introduction of deeper tissue manipulation, such as muscle and fascia repositioning, led to more natural and longer-lasting results. In recent years, minimally invasive techniques like the mini-facelift and thread lifts have gained popularity due to their reduced downtime and scarring.  Contemporary Facelift Procedure:  Modern facelift surgery is highly advanced and customizable. It typically involves the following steps:  1. Anesthesia: Local or general anesthesia is administered, depending on the extent of the procedure.  2. Incisions: Incisions are strategically made, often in the hairline, around the ears, and sometimes under the chin. The location and length of these incisions depend on the specific technique used and the patient's needs.  3. Tissue Elevation: The surgeon separates the skin from the underlying tissues, including muscles and fat. This allows for repositioning and tightening of these structures to restore a more youthful appearance.  4. Skin Redraping: Excess skin is trimmed, and the remaining skin is redraped, ensuring a smoother and more youthful contour.  5. Closure: Incisions are closed with sutures, and dressings are applied.  Patient Satisfaction and Outcomes:  Numerous studies have reported high levels of patient satisfaction following facelift surgery. Patients commonly experience a significant reduction in wrinkles, sagging, and jowls. Psychological benefits, such as increased self-esteem and confidence, are also noted. The longevity of results varies depending on individual factors, including the patient's age, skin quality, and the surgical technique employed. Nevertheless, the effects of a well-executed facelift can last for several years.  Complications and Risks:  As with any surgical procedure, facelift surgery carries inherent risks and potential complications. These may include infection, hematoma, scarring, nerve injury, and unsatisfactory aesthetic outcomes. Preoperative assessment and careful surgical planning, as well as adherence to postoperative care instructions, can minimize these risks.  Conclusion:  Facelift surgery has come a long way since its inception, evolving from simple skin tightening to highly sophisticated and customized procedures. Patient satisfaction remains high, with both physical and psychological benefits observed. However, it is crucial to consider the potential complications and risks associated with the surgery. Advances in surgical techniques, patient assessment, and postoperative care have led to safer and more satisfying outcomes for those seeking facial rejuvenation through facelift surgery.  Future research in the field of facelift surgery may focus on refining techniques, improving patient selection, and developing less invasive procedures to meet the growing demand for facial rejuvenation while minimizing the associated risks. | A facelift, also known as a rhytidectomy, is a surgical procedure that improves the visible signs of aging on the face and neck. It can be used to reduce wrinkles, tighten sagging skin, and improve the overall appearance of the jawline.  Facelifts are one of the most popular cosmetic surgery procedures in the world. In 2021, over 116,000 facelifts were performed in the United States, making it the third most popular cosmetic surgery procedure after breast augmentation and liposuction.  History of the Facelift  The first facelift surgery was performed in the early 1900s by a German surgeon named Eugen Hollander. Hollander's technique involved making an incision behind the ear and then pulling the skin back and suturing it in place. This technique is still used today, but there have been many refinements and advances over the years.  Modern Facelift Techniques  There are a number of different facelift techniques available today. The most common type of facelift is the traditional facelift, which involves making incisions behind the ears and around the hairline. The surgeon then separates the skin from the underlying tissues and removes excess skin and fat. The skin is then pulled back and sutured in place.  Another type of facelift is the mini facelift, which is less invasive than the traditional facelift. Mini facelifts involve making smaller incisions and only removing a small amount of skin and fat. Mini facelifts are often a good option for patients with less severe signs of aging.  Facelift Results  Facelift surgery can produce dramatic results. Patients typically look younger and more refreshed after surgery. The results of a facelift can last for several years, but it is important to note that aging is a natural process and cannot be stopped completely.  Facelift Complications  Facelift surgery is generally safe, but there are some risks associated with any surgery. These risks include bleeding, infection, and a reaction to anesthesia. Other potential complications of facelift surgery include nerve damage, scarring, and changes in facial sensation.  Facelift Satisfaction  Patient satisfaction with facelift surgery is high. A study published in the journal Plastic and Reconstructive Surgery found that over 90% of patients were satisfied with the results of their facelift surgery.  Literature Review  A number of studies have been conducted on the efficacy and safety of facelift surgery. A 2020 systematic review of facelift studies found that facelift surgery was effective in reducing wrinkles and tightening sagging skin. The review also found that the complication rate of facelift surgery was low.  Another study, published in the journal JAMA Facial Plastic Surgery in 2021, found that facelift surgery was associated with improved quality of life and self-esteem. The study also found that the results of facelift surgery were durable, with most patients still satisfied with the results of their surgery five years after surgery.  Overall, the literature suggests that facelift surgery is a safe and effective procedure for improving the visible signs of aging on the face and neck. Patients who are considering facelift surgery should discuss their individual needs and goals with a qualified plastic surgeon. |

- 1. Writing of a scientific article (literature review)

Prompt: “Find a topic for a scientific paper on facelift.”

| ChatGPT | Bard |
| --- | --- |
| Title: "Long-term Outcomes and Patient Satisfaction in Facelift Surgery: A Systematic Review and Meta-analysis" | Sure, here are some topics for a scientific paper on facelift:  The effects of facelift on facial nerve function  The long-term effects of facelift on facial appearance  The safety and efficacy of different facelift techniques  The use of minimally invasive techniques for facelift  The psychological effects of facelift  The cost-effectiveness of facelift  The impact of facelift on quality of life  The role of patient expectations in facelift outcomes  These are just a few ideas, and there are many other topics that could be explored in a scientific paper on facelift. The best topic for your paper will depend on your research interests and the specific questions you are trying to answer. |
| Follow up prompt: “Do you have any other suggestions for articles?” | N/A |
| Certainly! Here are a few additional topic suggestions for scientific papers on facelift surgery:  "Advancements in Surgical Techniques for Facelift: A Comparative Analysis"  Compare and evaluate different surgical techniques used in facelift surgery, such as deep plane facelift, SMAS facelift, and mini facelift, focusing on their efficacy, outcomes, and associated complications.  "Safety and Efficacy of Non-Surgical Facelift Alternatives: A Systematic Review"  Conduct a comprehensive review of non-surgical alternatives to facelift surgery, such as thread lifts, injectables, and energy-based devices, analyzing their safety profiles, effectiveness, duration of results, and patient satisfaction.  "Patient Expectations and Satisfaction in Facelift Surgery: A Qualitative Study"  Perform in-depth interviews or surveys with facelift patients to explore their expectations, motivations, and experiences, assessing the impact of these factors on patient satisfaction and psychosocial outcomes.  "Facelift Surgery in Different Ethnic Populations: Considerations and Outcomes"  Investigate the unique considerations and outcomes of facelift surgery in diverse ethnic populations, highlighting anatomical variations, cultural influences, and patient satisfaction levels.  "The Role of Preoperative Imaging in Facelift Surgery Planning: Current Evidence and Future Directions"  Review the existing literature on the use of imaging modalities (e.g., CT scans, MRI) in preoperative planning for facelift surgery, assessing their utility in surgical decision-making, outcomes, and predicting post-operative results.  "The Impact of Facelift Surgery on Quality of Life: A Longitudinal Study"  Conduct a longitudinal study to evaluate the long-term impact of facelift surgery on patients' quality of life, including psychosocial well-being, self-esteem, body image perception, and overall satisfaction.  Remember to consider the availability of data, your research interests, and the relevance of the topic to the field of facelift surgery. Additionally, always follow the guidelines and requirements of the target journal you plan to submit your paper to. | N/A |

- 1. Perform a literature analysis

Prompt: “Can you highlight the weaknesses of the following study: DOI: 10.1007/s00266-022-02894-8?”

| ChatGPT | Bard |
| --- | --- |
| I apologize, but as an AI language model, my responses are generated based on a mixture of licensed data, data created by human trainers, and publicly available data. I have not been trained on specific medical journal articles, including the study with the provided DOI. Therefore, I cannot provide a specific critique or weaknesses of that particular study.  To evaluate the weaknesses of a study, it is necessary to carefully review the article itself, including its methodology, data analysis, sample size, limitations, and potential biases. If you have access to the full text of the article, I recommend reading it and critically analyzing the study design, methodology, and results. Alternatively, you can consult with a medical professional or researcher who can assist you in evaluating the strengths and weaknesses of the study.  Additionally, if you have specific questions about facelifts or related topics, I'm here to provide general information and assistance to the best of my abilities based on my training. | Sure. The study you linked to is a systematic review and meta-analysis of early relapse after facelift. The authors identified 11 studies that met their inclusion criteria and pooled the data to assess the risk of early relapse. They found that the risk of early relapse was 12%.  The study has a number of weaknesses. First, the included studies were of variable quality. Some studies were well-designed and well-conducted, while others were not. Second, the studies were heterogeneous in terms of the type of facelift performed, the follow-up period, and the definition of relapse. This makes it difficult to draw firm conclusions from the pooled data. Third, the study was limited by its small sample size. With only 11 studies, the results may not be generalizable to the wider population.  Despite these weaknesses, the study provides some useful information about the risk of early relapse after facelift. The findings suggest that early relapse is a relatively rare event, but it is still a possibility. Patients considering facelift surgery should be aware of the risk of early relapse and discuss it with their surgeon.  Here are some additional weaknesses of the study:  The study was limited to studies published in English. This means that it is possible that other studies that were published in other languages were not included in the analysis.  The study only included studies that reported on the risk of early relapse. It is possible that other studies that did not report on this outcome may have found different results.  The study was conducted over a relatively short period of time. It is possible that the risk of early relapse may be higher or lower over a longer period of time.  Overall, the study provides some useful information about the risk of early relapse after facelift. However, the study has a number of weaknesses that should be considered when interpreting the results. |
| Follow up prompt: “Bard replied as follows:[see reply from Bard]. What do you think?” | N/A |
| The points mentioned by Bard regarding the weaknesses of the study are valid considerations. Here's a recap:  Variable quality of included studies: The variability in study design and quality can affect the overall reliability and generalizability of the findings. Studies with weaker methodologies or potential biases may impact the accuracy of the pooled data and subsequent conclusions.  Heterogeneity of included studies: The differences in facelift techniques, follow-up periods, and definitions of relapse among the included studies can introduce heterogeneity. This variation makes it challenging to draw definitive conclusions or make direct comparisons across the studies.  Small sample size: The inclusion of only 11 studies in the analysis limits the statistical power and generalizability of the findings. A larger sample size would provide more robust and representative results.  Language bias: By limiting the study to articles published in English, there is a possibility of excluding relevant studies published in other languages, which could introduce language bias and affect the comprehensiveness of the analysis.  Selective reporting bias: The study focused only on studies reporting on the risk of early relapse. This may introduce selective reporting bias, as studies that did not report on this specific outcome might have different results. This can affect the overall interpretation of the risk of early relapse after facelift.  Short follow-up period: The study's focus on early relapse and the relatively short follow-up period may not capture the complete picture of relapse rates over a longer period. Long-term outcomes and relapse rates beyond the early phase may differ and warrant further investigation.  Considering these weaknesses, it is important to interpret the study's findings with caution. The study provides valuable insights into the risk of early relapse after facelift, but further research with larger sample sizes, standardized methodologies, longer follow-up periods, and consideration of diverse populations would enhance our understanding of this topic. It's always recommended to discuss the specific risks and outcomes of facelift surgery with a qualified plastic surgeon based on their experience and expertise. | N/A |

- 1. Summary of a scientific article

Prompt: “an you summarise by paraphrasing this abstract:

Abstract

Background: Early relapse is an adverse outcome of facelift surgery. The rate of early relapse is an indirect measure of the longevity and efficacy of facelift techniques. However, early relapse after facelift is ill-defined, under-evaluated, and under-reported, and literature data on the subject are dispersed. In this systematic review, we aimed to analyze facelift studies using relapse-related outcomes (RROs). Our secondary aim was to highlight the importance of early relapse as an essential outcome measure.

Methods: The study design was a systematic review of the English literature and meta-analysis of RROs after facelift surgery. RROs that occurred within the first 2 years after surgery were considered "early". Performance, analysis, and reporting were performed in accordance with the PRISMA guidelines. The systematic search was conducted using the PubMed database as of February 2020. Initial screening was performed using the keywords "facelift", "rhytidectomy", "surgical rejuvenation", "face lift", "rhytidoplasty", and "facial rejuvenation". Articles were excluded by using a set of inclusion and exclusion criteria.

Results: RROs were reported only in 4.4% (19/433) of the papers that underwent full-text review. The frequency of RROs ranged between 0.2 and 50% among facelift papers. The weighted median rate of RROs after facelift surgery was found to be 2.4% in the meta-analysis.

Conclusions: Future research on preventive measures will be successful upon acknowledgment of the actual prevalence of this problem. Consensus on its definition and objective criteria for its diagnosis are required for further progress.”

| ChatGPT | Bard |
| --- | --- |
| Sure! Here's a paraphrased summary of the abstract you provided:  The abstract discusses the issue of early relapse after facelift surgery, highlighting its significance as an outcome measure and the lack of standardization in its definition and evaluation. The objective of this systematic review was to analyze studies that reported relapse-related outcomes (RROs) after facelift surgery, specifically focusing on early relapse within the first 2 years after the procedure. The review followed PRISMA guidelines, and a systematic search of the English literature was conducted. Among the papers reviewed, only 4.4% reported RROs, with the frequency of occurrence ranging from 0.2% to 50%. The meta-analysis revealed a weighted median rate of RROs of 2.4% after facelift surgery. The authors emphasize the need for future research to establish preventive measures, while also highlighting the importance of consensus on defining early relapse and developing objective diagnostic criteria for further advancements.  Please note that this is a paraphrased summary and may not capture all the details of the abstract. For a comprehensive understanding of the study, it is advisable to refer to the original article. | Sure, here is a summary of the abstract:  Early relapse is a negative outcome of facelift surgery.  The rate of early relapse is an indirect measure of the longevity and efficacy of facelift techniques.  However, early relapse is not well-defined, under-evaluated, and under-reported.  This study aimed to analyze facelift studies using relapse-related outcomes (RROs).  The study found that the weighted median rate of RROs after facelift surgery was 2.4%.  Future research on preventive measures will be successful upon acknowledgment of the actual prevalence of this problem.  Consensus on its definition and objective criteria for its diagnosis are required for further progress.  In simpler terms, this study found that about 2% of people who have a facelift experience early relapse within two years of the surgery. Early relapse is when the effects of the facelift start to wear off before the expected time period. This can be due to a number of factors, including the patient's age, genetics, and lifestyle habits.  The study authors believe that more research is needed to better understand early relapse and to develop preventive measures. They also believe that it is important to develop a clear definition of early relapse and objective criteria for its diagnosis. This will help to ensure that future studies on this topic are more accurate and consistent.  Sources  [www.researchgate.net/publication/360491763_A_Systematic_Review_and_Meta-Analysis_of_Early_Relapse_After_Facelift](http://www.researchgate.net/publication/360491763_A_Systematic_Review_and_Meta-Analysis_of_Early_Relapse_After_Facelift) |

- 1. Citing authors

Prompt: “Who are the authors? Can you find the reference for me?”

| ChatGPT | Bard |
| --- | --- |
| I apologize for the confusion, but as an AI language model, my responses are generated based on a mixture of licensed data, data created by human trainers, and publicly available data. I don't have direct access to specific article databases or the ability to browse the internet. Therefore, I'm unable to provide you with the specific authors or the reference for the abstract you mentioned.  To find the reference and authors of the abstract you provided, you can search for the DOI or the title of the article using academic databases such as PubMed, Google Scholar, or the publisher's website. These resources should provide you with the complete reference, including the authors' names and other relevant details of the study.  Alternatively, if you have access to the full text of the article or if you obtained it from a specific source, the authors' names should be mentioned within the article itself, usually near the beginning or at the end of the paper.  I apologize for any inconvenience caused, and I encourage you to retrieve the specific reference through the aforementioned methods. | Sure. The authors of the study are:  Maria Eugenia López-Carrillo  Juan Carlos García-de-Lorenzo  Juan Manuel de la Torre-Monreal  José María López-Ibor Jr.  Enrique Herrera-Ortiz  The reference for the study is:  López-Carrillo ME, García-de-Lorenzo JC, de la Torre-Monreal JM, López-Ibor Jr JM, Herrera-Ortiz E. Early relapse after facelift surgery: A systematic review and meta-analysis. J Plast Reconstr Aesthet Surg. 2022;75(4):649-656. doi:10.1007/s00266-022-02894-8 |
| N/A | Follow up prompt: “the DOI is correct but the authors do not match” |
| N/A | I apologize for the error. The correct authors for the study are:  Maria Eugenia López-Carrillo  Juan Carlos García-de-Lorenzo  Juan Manuel de la Torre-Monreal  José María López-Ibor Jr.  Enrique Herrera-Ortiz  The reference for the study is:  López-Carrillo ME, García-de-Lorenzo JC, de la Torre-Monreal JM, López-Ibor Jr JM, Herrera-Ortiz E. Early relapse after facelift surgery: A systematic review and meta-analysis. Aesthetic Plast Surg. 2023 Feb;47(1):144-155. doi: 10.1007/s00266-022-02894-8. Epub 2022 May 9 |
| N/A | Follow up prompt: “the authors are Arda Kucukguven, Aysuna Galandarova & Ozan Bitik” |
| N/A | You are correct. The authors of the study you linked are:  Arda Küçükgüven  Aysuna Galandarova  Ozan Bitik  The reference for the study is:  Küçükgüven A, Galandarova A, Bitik O. Early relapse after facelift surgery: a systematic review and meta-analysis. Aesthetic Plast Surg. 2023 |
| N/A | Follow up prompt: “Who are the authors of the article entitled : A Systematic Review and Meta-Analysis of Early Relapse After Facelift?” |
| N/A | The authors of the article entitled "A Systematic Review and Meta-Analysis of Early Relapse After Facelift" are:  Arda Küçükgüven  Aysuna Galandarova  Ozan Bitik |

- 1. Prodive marketing material

Prompt: “Can you create content for my blog about facelifts.”

| ChatGPT | Bard |
| --- | --- |
| Certainly! I'd be happy to help you create content for your blog about facelifts. Here's an article that provides an overview of facelifts, their benefits, considerations, and what to expect during the procedure and recovery. Feel free to customize it to fit your blog's style and tone:  Title: A Comprehensive Guide to Facelifts: Restoring Youthful Vitality  Introduction:  As we age, the visible signs of time and gravity often become more apparent on our faces. Facelift surgery, also known as rhytidectomy, is a cosmetic procedure designed to address these signs of aging and restore a more youthful and refreshed appearance. In this comprehensive guide, we'll delve into the world of facelifts, exploring the benefits, considerations, and the journey from pre-op to recovery.  I. Understanding Facelifts:  What is a Facelift?  Define facelift and its purpose.  Discuss how it targets sagging skin, deep wrinkles, and facial volume loss.  Explain the difference between a full facelift and a mini facelift.  Benefits of Facelift Surgery:  Highlight the transformative effects of facelifts, including improved facial contours, reduced wrinkles, and a more youthful appearance.  Discuss the boost in self-confidence and enhanced quality of life that often accompany successful facelift outcomes.  II. Candidacy and Considerations:  Candidacy for Facelifts:  Describe the typical age range of facelift candidates.  Mention factors such as overall health, realistic expectations, and personal motivations that influence candidacy.  Discuss alternative treatments for individuals who may not be suitable candidates for surgery.  Consulting with a Plastic Surgeon:  Emphasize the importance of an initial consultation with a board-certified plastic surgeon.  Provide tips on what to discuss during the consultation, including concerns, goals, and medical history.  III. The Facelift Procedure:  Preparing for the Surgery:  Outline the pre-operative steps, including medical evaluations, medication adjustments, and lifestyle modifications.  Discuss the importance of following the surgeon's instructions regarding diet, alcohol consumption, and smoking cessation.  The Surgical Process:  Provide an overview of the facelift procedure, including anesthesia options, incision placement, and techniques used to tighten underlying tissues.  Explain how excess skin is removed and incisions are closed.  IV. Recovery and Results:  Post-Operative Care:  Offer a timeline of the recovery process, highlighting common experiences such as swelling, bruising, and discomfort.  Discuss the importance of following the surgeon's post-operative instructions regarding rest, wound care, and medication.  Long-Term Results and Maintenance:  Explain that while a facelift can turn back the clock, it does not stop the aging process entirely.  Provide tips on maintaining the results, such as practicing good skincare, protecting the skin from sun damage, and adopting a healthy lifestyle.  Conclusion:  A facelift can be a transformative experience, helping individuals regain their confidence and restore a more youthful appearance. By understanding the procedure, considering candidacy factors, and partnering with a skilled plastic surgeon, one can embark on a journey towards rejuvenation and embrace the newfound vitality that a facelift can provide.  Remember, it's essential to consult with a qualified medical professional for personalized advice and recommendations regarding facelift procedures. They can guide you through the process and help you achieve your desired results.  [Include a brief author bio and relevant disclosures]  Please note that while this article provides general information, it is not a substitute for medical advice. Always consult with a qualified healthcare professional for personalized recommendations and to address any specific concerns you may have.  [Include a brief author bio and relevant disclosures]  I hope this helps! If you have any specific preferences or additional topics you'd like to cover in the blog post, please let me know, and I'll be happy to assist you further. | Sure, here is a blog post about facelifts:  What is a facelift?  A facelift, also known as a rhytidectomy, is a surgical procedure that is used to improve the appearance of the face and neck. It is typically performed on people who are in their 40s, 50s, or 60s, and who are starting to show signs of aging, such as sagging skin, jowls, and a double chin.  How does a facelift work?  A facelift is performed under general anesthesia. The surgeon makes incisions in the scalp, behind the ears, and in the lower face. The skin is then lifted and tightened, and any excess skin is removed. The incisions are then closed with sutures or staples.  What are the risks of a facelift?  The risks of a facelift are similar to the risks of any surgery, and include infection, bleeding, and scarring. Other risks that are specific to facelifts include numbness in the face, hair loss, and asymmetry.  What are the benefits of a facelift?  The benefits of a facelift can be significant. A facelift can improve the appearance of the face and neck, making people look younger and more refreshed. It can also boost self-confidence and improve quality of life.  What is the cost of a facelift?  The cost of a facelift varies depending on the surgeon, the location of the surgery, and the extent of the procedure. In general, facelifts cost between $5,000 and $15,000.  Is a facelift right for me?  If you are considering a facelift, it is important to talk to your doctor about the risks and benefits of the procedure. Your doctor can help you decide if a facelift is right for you.  Here are some additional things to consider before having a facelift:  Your age. Facelifts are typically performed on people who are in their 40s, 50s, or 60s.  Your lifestyle. If you are active and have a busy lifestyle, you may want to consider a less invasive procedure, such as a mini-facelift or a necklift.  Your expectations. It is important to have realistic expectations about what a facelift can achieve. A facelift cannot stop the aging process, but it can improve the appearance of the face and neck.  If you decide that a facelift is right for you, be sure to do your research and choose a qualified surgeon. A facelift can be a safe and effective way to improve the appearance of the face and neck. |

**APPENDIX 2 - Students**

2.1 Physiopathology

Prompt: “What anatomically induces age in a face?”

| ChatGPT | Bard |
| --- | --- |
| Several anatomical changes contribute to the aging appearance of the face. Here are some key factors:  Loss of Skin Elasticity: Over time, the skin's natural elasticity decreases due to a decrease in collagen and elastin production. This leads to sagging and the formation of wrinkles and fine lines.  Volume Loss: The face experiences a loss of fat and subcutaneous tissue, particularly in the cheeks, temples, and around the eyes. This loss of volume can result in a hollowed or sunken appearance.  Muscle Changes: The facial muscles can weaken and atrophy with age, leading to a loss of tone and support. This can contribute to sagging and drooping of facial features.  Bone Resorption: The bones of the face can undergo changes, such as bone resorption, particularly in the jawline and cheeks. This can result in a loss of definition and a less youthful facial contour.  Changes in Facial Proportions: As we age, there can be alterations in the proportions and distribution of fat and tissue in the face. For example, the lower face may become more prominent compared to the upper face, leading to a less balanced and aged appearance.  Skin Texture Changes: The texture of the skin can become rougher and uneven with age due to factors like sun damage, reduced cellular turnover, and a decrease in natural moisture content.  Gravity Effects: Gravity plays a role in facial aging, causing tissues to descend and contribute to sagging in areas such as the jowls and neck.  It's important to note that these anatomical changes can vary from person to person and are influenced by factors such as genetics, lifestyle, sun exposure, and overall health. Facial aging is a complex process, and the combination of these factors contributes to the overall appearance of aging in the face. | There are a number of anatomical changes that occur with age that can contribute to the appearance of aging in the face. These changes include:  Loss of collagen and elastin: Collagen and elastin are two proteins that give skin its strength and elasticity. As we age, our bodies produce less of these proteins, which can lead to sagging skin and wrinkles.  Thinning of the skin: The skin on our face becomes thinner with age. This is due to a combination of factors, including the loss of collagen and elastin, as well as the natural breakdown of cells.  Loss of fat: The face also loses fat with age. This can lead to sunken cheeks and a loss of volume in the face.  Changes in the bone structure: The bones in our face also change with age. The jawbone can shrink, which can lead to a loss of definition in the face.  Changes in the muscles: The muscles in our face also weaken with age. This can lead to drooping eyelids and a loss of expression.  In addition to these anatomical changes, there are a number of other factors that can contribute to the appearance of aging in the face, including:  Sun exposure: Ultraviolet (UV) rays from the sun can damage the skin and accelerate the aging process.  Smoking: Smoking can damage the skin and contribute to the appearance of wrinkles and age spots.  Stress: Stress can also contribute to the appearance of aging by increasing the production of free radicals, which can damage the skin.  There are a number of things that can be done to slow down the aging process and improve the appearance of the face. These include:  Wear sunscreen: Sunscreen is the best way to protect the skin from UV damage. It is important to wear sunscreen every day, even on cloudy days.  Quit smoking: Smoking can damage the skin and contribute to the appearance of wrinkles and age spots. Quitting smoking is one of the best things you can do for your skin.  Manage stress: Stress can contribute to the appearance of aging by increasing the production of free radicals. There are a number of things you can do to manage stress, such as exercise, yoga, and meditation.  Get enough sleep: Sleep is essential for skin health. When you sleep, your body produces hormones that help to repair the skin. Aim for 7-8 hours of sleep each night.  Eat a healthy diet: A healthy diet can help to improve the overall health of your skin. Make sure to eat plenty of fruits, vegetables, and whole grains.  Stay hydrated: Staying hydrated is important for overall health, and it can also help to improve the appearance of the skin. Aim to drink 8 glasses of water each day.  Use skin care products: There are a number of skin care products that can help to improve the appearance of the skin. Look for products that contain ingredients such as retinol, hyaluronic acid, and vitamin C.  Get professional treatments: There are a number of professional treatments that can help to improve the appearance of the skin. These treatments include chemical peels, laser treatments, and injectables.  By following these tips, you can help to slow down the aging process and improve the appearance of your face. |

2.2 Anatomy

Prompt: “What is a retaining ligament? What is SMAS?”

| ChatGPT | Bard |
| --- | --- |
| A retaining ligament and SMAS (Superficial Musculoaponeurotic System) are two important anatomical structures in the face that are relevant to plastic surgery procedures, particularly facelifts.  Retaining Ligament:  Retaining ligaments, also known as retaining septa, are fibrous bands or structures in the face that provide support and maintain the position of certain facial tissues. These ligaments attach the skin to the underlying facial bones or deep fascia, helping to anchor and stabilize the soft tissues. Retaining ligaments play a crucial role in facial aesthetics and surgical techniques as they influence the distribution of facial fat, facial contours, and the effects of facial aging.  SMAS (Superficial Musculoaponeurotic System):  The SMAS is a layer of fibrous tissue located deep to the skin and subcutaneous fat in the face. It consists of muscular and fibrous components and extends throughout the face, connecting various facial muscles. The SMAS provides structural support to the face and is an essential target for surgical manipulation in facelift procedures.  During a facelift, the surgeon typically lifts and repositions the SMAS layer along with the overlying skin. By manipulating the SMAS layer, the surgeon can achieve more long-lasting results and address sagging facial tissues. Techniques such as SMAS plication, SMAS imbrication, or SMASectomy are used to tighten and reposition the SMAS layer, which in turn lifts and rejuvenates the skin and underlying structures.  The understanding and manipulation of the retaining ligaments and SMAS are crucial for plastic surgeons performing facelift procedures. These structures are considered when planning the surgical approach, determining the extent of dissection, and achieving optimal outcomes in facial rejuvenation surgery. | A retaining ligament is a fibrous band of tissue that attaches the skin to the underlying bone or muscle. There are several retaining ligaments in the face, and they play an important role in maintaining the structure and shape of the face. As we age, the retaining ligaments can weaken and stretch, which can lead to sagging skin and jowls.  SMAS stands for superficial musculoaponeurotic system. It is a layer of tissue that lies below the skin and above the muscle. The SMAS is responsible for providing support and structure to the face. It also helps to move the facial muscles. As we age, the SMAS can weaken and sag, which can lead to sagging skin and jowls.  In a facelift, the surgeon may release the retaining ligaments and tighten the SMAS to lift and reposition the skin. This can help to improve the appearance of sagging skin and jowls.  Here are some additional details about retaining ligaments and SMAS:  Retaining ligaments are found in all areas of the face, but they are most concentrated in the cheeks, jawline, and neck.  The SMAS is a thin, fibrous layer of tissue that covers the entire face. It is attached to the underlying bone and muscle.  The SMAS is made up of three layers: the superficial layer, the intermediate layer, and the deep layer.  The superficial layer of the SMAS is attached to the skin.  The intermediate layer of the SMAS is attached to the muscle.  The deep layer of the SMAS is attached to the bone.  Retaining ligaments and SMAS play an important role in maintaining the structure and shape of the face. As we age, these structures can weaken and sag, which can lead to sagging skin and jowls. A facelift can help to improve the appearance of sagging skin and jowls by releasing the retaining ligaments and tightening the SMAS. |

2.3 Explanation of surgical techniques

Prompt: “What are the lifting techniques?”

| ChatGPT | Bard |
| --- | --- |
| There are several lifting techniques used in facial rejuvenation surgery, including facelifts. The choice of technique depends on the patient's specific needs, desired outcomes, and the surgeon's expertise. Here are some commonly employed lifting techniques:  Traditional Facelift (SMAS Facelift):  This technique involves making incisions along the hairline, extending around the ear, and sometimes into the scalp. The surgeon lifts and tightens the underlying SMAS layer, repositions facial fat pads, and removes excess skin to achieve a more youthful appearance. The incisions are then closed with sutures.  Deep Plane Facelift:  In a deep plane facelift, the surgeon releases and lifts the deeper facial layers, including the SMAS and deeper facial fat compartments. This technique allows for more significant lifting and repositioning of sagging tissues. It is often favored for patients with advanced facial aging or significant laxity.  Mid-Face Lift:  This technique targets the mid-face area, including the cheeks and under-eye region. Incisions are typically made within the hairline or around the temples. The surgeon lifts and repositions the deeper tissues to restore volume and improve the appearance of sagging in the mid-face.    Thread Lift:  Thread lifts involve the insertion of special sutures with small cones or barbs into the skin to lift and suspend sagging facial tissues. The sutures are anchored to deeper tissues, and they provide immediate lift and ongoing support. Thread lifts are less invasive than traditional facelifts and may be suitable for individuals with milder facial aging or those seeking a minimally invasive option.  Mini Facelift (S-Lift or Short Scar Facelift):  This technique is a modified version of the traditional facelift, targeting the lower face and jowls. It involves smaller incisions around the ears, resulting in shorter scars and a quicker recovery. The mini facelift is suitable for patients with mild to moderate signs of aging who desire subtle rejuvenation.  Neck Lift:  A neck lift focuses on improving the appearance of the neck, including sagging skin, excess fat, and muscle banding. The incisions are typically made under the chin or behind the ears, and the surgeon tightens the underlying muscles, removes excess fat, and trims and re-drapes the skin to create a more youthful neck contour.  These are just a few of the various lifting techniques available in facial rejuvenation surgery. The specific technique used will depend on individual factors, such as the patient's anatomy, degree of facial aging, and desired outcomes. It is crucial to consult with a qualified and experienced plastic surgeon to determine the most appropriate technique for your specific needs. | There are a number of lifting techniques that can be used to improve the appearance of the face. These techniques include:  Facelift: A facelift is a surgical procedure that involves lifting and tightening the skin of the face.  Thread lift: A thread lift is a non-surgical procedure that involves using threads to lift and tighten the skin of the face.  Fillers: Fillers are injectable substances that can be used to fill in wrinkles and restore volume to the face.  Botox: Botox is a neurotoxin that can be used to relax the muscles and reduce the appearance of wrinkles.  Laser treatments: Laser treatments can be used to improve the appearance of wrinkles, age spots, and sun damage.  Chemical peels: Chemical peels can be used to improve the appearance of wrinkles, age spots, and sun damage.  The best lifting technique for you will depend on your individual needs and goals. It is important to talk to a qualified plastic surgeon to discuss your options and to make an informed decision about the best treatment for you.  Here are some additional details about each lifting technique:  Facelift: A facelift is a surgical procedure that involves lifting and tightening the skin of the face. The incisions are typically made in front of the ears and behind the hairline. The surgeon will then lift the skin and tighten the underlying tissues. The incisions are then closed with stitches. A facelift can take several hours to perform and requires general anesthesia. Recovery from a facelift typically takes several weeks.  Thread lift: A thread lift is a non-surgical procedure that involves using threads to lift and tighten the skin of the face. The threads are typically made of a biocompatible material, such as polydioxanone (PDO) or polylactin (PLA). The threads are inserted into the skin using a needle or cannula. The threads then stimulate the production of collagen, which helps to lift and tighten the skin. A thread lift typically takes 30 minutes to an hour to perform and does not require anesthesia. Recovery from a thread lift is typically quick and easy.  Fillers: Fillers are injectable substances that can be used to fill in wrinkles and restore volume to the face. Fillers are typically made of hyaluronic acid, collagen, or fat. Hyaluronic acid is a naturally occurring substance that helps to keep the skin hydrated. Collagen is a protein that gives the skin its strength and elasticity. Fat is a type of tissue that can be used to fill in wrinkles and restore volume to the face. Fillers are typically injected into the skin using a needle or cannula. The procedure is typically quick and easy and does not require anesthesia. Recovery from filler injections is typically quick and easy.  Botox: Botox is a neurotoxin that can be used to relax the muscles and reduce the appearance of wrinkles. Botox is injected into the muscles using a needle or cannula. The procedure is typically quick and easy and does not require anesthesia. Recovery from Botox injections is typically quick and easy.  Laser treatments: Laser treatments can be used to improve the appearance of wrinkles, age spots, and sun damage. Laser treatments work by emitting light that penetrates the skin and damages the cells that produce pigment. This can help to reduce the appearance of age spots and sun damage. Laser treatments can also be used to heat the collagen in the skin, which can help to lift and tighten the skin. Laser treatments are typically performed by a dermatologist or plastic surgeon. The procedure typically takes 30 minutes to an hour and may require anesthesia. Recovery from laser treatments can take several days to several weeks.  Chemical peels: Chemical peels can be used to improve the appearance of wrinkles, age spots, and sun damage. Chemical peels work by removing the outer layer of skin, which exposes the younger, healthier skin underneath. Chemical peels are typically performed by a dermatologist or plastic surgeon. The procedure typically takes 30 minutes to an hour and may require anesthesia. Recovery from chemical peels can take several days to several weeks. |

2.4 Exams: creation of multiple-choice questions (MCQ)

Prompt: “Can you create 3 multiple choice questions for me about the facelift?”

| ChatGPT | Bard |
| --- | --- |
| Of course! Here are three multiple-choice questions about facelifts:  Which of the following is a primary objective of a facelift procedure?  a) Enhancing lip volume  b) Correcting vision problems  c) Reducing facial wrinkles and sagging  d) Treating acne scars    Which layer of the face is commonly targeted and manipulated during a facelift?  a) Epidermis  b) Subcutaneous fat  c) Superficial Musculoaponeurotic System (SMAS)  d) Deep fascia    What is the typical location of incisions made during a traditional facelift?  a) Along the jawline and chin  b) On the forehead and scalp  c) Around the eyes and temples  d) Along the hairline and around the ears    Please note that these questions are for informational purposes and do not replace professional medical advice. | Sure, here are 3 multiple choice questions for you about the facelift:  What is the main goal of a facelift?  To remove wrinkles  To lift and tighten the skin  To reduce the appearance of jowls  All of the above    What are the risks of a facelift?  Infection  Bleeding Scarring  All of the above    How long does it take to recover from a facelift?  A few days  A few weeks  A few months  It depends on the individual    I hope this helps! |
| Follow up prompt: “and the answers? | |
| ChatGPT | Bard |
| Certainly! Here are the answers to the multiple-choice questions:  Which of the following is a primary objective of a facelift procedure?  Answer: c) Reducing facial wrinkles and sagging    Which layer of the face is commonly targeted and manipulated during a facelift?  Answer: c) Superficial Musculoaponeurotic System (SMAS)    What is the typical location of incisions made during a traditional facelift?  Answer: d) Along the hairline and around the ears    I hope that helps! | Sure, here are the answers to the multiple choice questions I gave you:  What is the main goal of a facelift?  To remove wrinkles  To lift and tighten the skin  To reduce the appearance of jowls  All of the above  The answer is All of the above. A facelift is a surgical procedure that is used to improve the appearance of the face by lifting and tightening the skin, reducing the appearance of wrinkles and jowls.    What are the risks of a facelift?  Infection  Bleeding Scarring  All of the above  The answer is All of the above. Facelift is a surgery and all surgeries carry risks. Some of the risks of a facelift include infection, bleeding, scarring, and asymmetry.    How long does it take to recover from a facelift?  A few days  A few weeks  A few months  It depends on the individual  The answer is It depends on the individual. The recovery time from a facelift can vary depending on a number of factors, including the extent of the surgery, the patient's age and overall health, and their individual healing process. Generally, most patients can expect to take 2-4 weeks off work to recover from a facelift.    I hope this helps! |

2.5 Exams: Creation of a clinical case for EBOPRAS (European Board of Plastic, Reconstructive, and Aesthetic Surgery)

Prompt: “Can you come up with a relevant clinical case on facelift that would make me review EBOPRAS?”

| ChatGPT | Bard |
| --- | --- |
| Certainly! Here's a relevant clinical case on facelift that may help you review EBOPRAS (European Board of Plastic, Reconstructive, and Aesthetic Surgery) knowledge:  Clinical Case: Facial Rejuvenation in a 55-year-old Woman  Patient Profile:  A 55-year-old woman presents to the plastic surgery clinic with concerns about facial aging. She desires a more youthful and rejuvenated appearance, particularly addressing sagging skin and wrinkles in her lower face and neck. The patient has a history of significant sun exposure and is a non-smoker. She is in overall good health and has no known allergies or medical conditions.  Case Presentation:  During the consultation, the patient discusses her expectations, goals, and concerns. She desires a natural-looking outcome and expresses her willingness to undergo a surgical procedure to achieve long-lasting results. The plastic surgeon performs a thorough evaluation of her facial anatomy, skin quality, and general health status.  Physical Examination Findings:  Upon examination, the patient exhibits moderate-to-severe jowling, sagging neck skin, and prominent nasolabial folds. Skin texture shows signs of photoaging, including fine lines and pigmentation irregularities. The patient has good skin elasticity and no evidence of significant volume loss.  Proposed Treatment Plan:  Based on the clinical assessment, the plastic surgeon recommends a traditional facelift procedure with a focus on addressing the lower face and neck. The treatment plan includes the following:  Traditional Facelift:  The surgeon plans to perform a traditional facelift, involving incisions made along the hairline, extending around the ears, and potentially into the scalp. The SMAS layer will be lifted, repositioned, and tightened to address jowling and sagging. Excess skin will be excised, and the incisions will be closed with sutures.    Neck Lift:  To address the sagging neck skin, the surgeon plans to incorporate a neck lift as part of the procedure. This will involve making additional incisions under the chin or behind the ears to access and tighten the neck muscles, remove excess fat if necessary, and redrape the skin for improved contour.  Adjunctive Procedures:  The surgeon may recommend adjunctive procedures such as fat grafting or laser resurfacing to further enhance facial volume, restore facial contours, and improve skin texture and tone.  EBOPRAS Review:  To ensure compliance with EBOPRAS guidelines and standards, the plastic surgeon will adhere to the principles of patient safety, surgical technique, and ethical practice throughout the entire process. They will consider factors such as preoperative assessment, surgical planning, informed consent, meticulous surgical technique, postoperative care, and monitoring for potential complications.  This clinical case highlights the importance of a comprehensive evaluation, individualized treatment planning, and adherence to professional standards when considering a facelift procedure. It also provides an opportunity to review and apply the knowledge and principles associated with EBOPRAS in clinical practice.  Note: This case is purely fictional and meant for educational purposes only. It does not represent a real patient. | Sure, here is a relevant clinical case on facelift that would make you review EBOPRAS:  A 55-year-old woman presented to her plastic surgeon with concerns about the appearance of her face. She had noticed that her skin was starting to sag and that she had developed jowls. She was also concerned about the appearance of her wrinkles. The plastic surgeon performed a physical exam and reviewed the patient's medical history. The plastic surgeon then discussed the patient's options for facelift surgery. The patient decided to have a facelift surgery. The surgery was performed under general anesthesia. The plastic surgeon made incisions in front of the ears and behind the hairline. The plastic surgeon then lifted the skin and tightened the underlying tissues. The incisions were then closed with stitches. The patient was discharged from the hospital the following day. The patient experienced some pain and swelling after the surgery. However, the pain and swelling subsided within a few days. The patient was able to return to work after two weeks. The patient was very happy with the results of the facelift surgery. She felt that her face looked younger and more refreshed. She was also pleased that the surgery had reduced the appearance of her wrinkles and jowls.  EBOPRAS is a European organization that sets standards for facelift surgery. The organization has developed a set of guidelines that surgeons must follow in order to be certified by EBOPRAS. The guidelines cover a variety of topics, including patient selection, surgical techniques, and postoperative care. By reviewing EBOPRAS, you can learn more about the standards of care for facelift surgery. This information can help you make an informed decision about whether or not to have a facelift surgery.  Here are some of the benefits of reviewing EBOPRAS:  You can learn more about the standards of care for facelift surgery.  You can make an informed decision about whether or not to have a facelift surgery.  You can find a qualified surgeon who is certified by EBOPRAS.  You can ensure that you receive the highest quality of care.  I hope this helps! |

2.6 Exams: Questions for oral exams (EBOPRAS)

Prompt: “What question could be asked about this clinical case during the EBOPRAS oral?”

| ChatGPT | Bard |
| --- | --- |
| During the EBOPRAS oral examination, a relevant question that could be asked about this clinical case is:  "Considering the patient's age, desired outcomes, and physical examination findings, what are the key factors you would consider when formulating a surgical plan for the facelift procedure? How would you address the patient's concerns while ensuring optimal aesthetic results and patient safety?"  This question assesses the candidate's knowledge and understanding of patient assessment, surgical planning, and the ability to balance the patient's desires with the principles of facial rejuvenation surgery. The candidate's response should demonstrate their proficiency in considering factors such as facial anatomy, skin quality, degree of facial aging, and incorporating appropriate techniques to achieve the desired outcomes while ensuring patient safety and satisfaction. | Here are some questions that could be asked about this clinical case during the EBOPRAS oral:  What are the indications for facelift surgery?  What are the risks and complications of facelift surgery?  What are the different surgical techniques for facelift surgery?  What are the postoperative care instructions for facelift surgery?  What are the long-term results of facelift surgery?  The EBOPRAS oral is a comprehensive exam that tests a candidate's knowledge and skills in plastic surgery. The exam covers a wide range of topics, including facelift surgery. By reviewing the clinical case and the EBOPRAS guidelines, you can prepare for the oral exam and increase your chances of success.  Here are some additional tips for preparing for the EBOPRAS oral:  Practice answering questions about facelift surgery.  Review the EBOPRAS guidelines.  Talk to other plastic surgeons who have taken the EBOPRAS oral.  Get plenty of rest and eat a healthy diet before the exam.  I hope this helps! |
| Follow up prompt: “and the answers? | |
| ChatGPT | Bard |
| As an AI language model, I can provide a sample answer to the question posed during the EBOPRAS oral examination based on the given clinical case. Please note that this is a simulated response and should not be considered as an authoritative answer. Actual responses may vary depending on individual knowledge, experience, and the specific requirements of the examination. Here's a sample answer:    "In formulating the surgical plan for the facelift procedure in this particular case, several key factors need to be considered. Firstly, the patient's age of 55 suggests a moderate degree of facial aging, which guides our approach to address the specific concerns. The physical examination findings indicate the presence of jowling, sagging neck skin, and prominent nasolabial folds.  To achieve the desired outcomes while ensuring optimal aesthetic results and patient safety, I would take into account the patient's expectations, desire for a natural-looking outcome, and their willingness to undergo a surgical procedure. The primary goal would be to create a more youthful and rejuvenated appearance in the lower face and neck region.  Considering the moderate degree of facial aging, a traditional facelift technique would be suitable. This would involve making incisions along the hairline, extending around the ears, and potentially into the scalp. By lifting and repositioning the SMAS layer, we can address the jowling and sagging. The excess skin will be excised, and meticulous closure will be performed to minimize visible scarring.  Additionally, given the presence of sagging neck skin, incorporating a neck lift as part of the procedure is essential. This would involve making additional incisions under the chin or behind the ears to access and tighten the neck muscles, remove excess fat if necessary, and redrape the skin for improved contour.  To further enhance the outcomes, adjunctive procedures such as fat grafting or laser resurfacing may be considered to restore facial volume and improve skin texture and tone.  Throughout the surgical planning process, I would prioritize patient safety, adherence to ethical principles, and compliance with EBOPRAS guidelines. This would involve a thorough preoperative assessment, obtaining informed consent, meticulous surgical technique, appropriate postoperative care, and monitoring for potential complications.  By carefully considering the patient's individual characteristics, desires, and incorporating appropriate techniques, I aim to achieve a successful outcome that aligns with the principles of facial rejuvenation surgery, while ensuring the highest standards of patient care and satisfaction."  Please note that this answer is for demonstration purposes only, and actual responses may vary depending on the candidate's knowledge, experience, and the specific requirements of the examination. | Here are some answers to the questions that could be asked about this clinical case during the EBOPRAS oral:  What are the indications for facelift surgery?  The indications for facelift surgery include:  Sagging skin of the face and neck  Jowls  Wrinkles  Loss of volume in the face  What are the risks and complications of facelift surgery?  The risks and complications of facelift surgery include:  Infection  Bleeding  Scarring  Asymmetry  Numbness  Pain  Sensitivity to light  Difficulty sleeping  Unnatural appearance    What are the different surgical techniques for facelift surgery?  There are two main surgical techniques for facelift surgery:  Traditional facelift: This is the most common type of facelift surgery. It involves making incisions in front of the ears and behind the hairline. The surgeon then lifts the skin and tightens the underlying tissues.  Minimally invasive facelift: This is a newer type of facelift surgery. It involves making smaller incisions and using less invasive techniques.  What are the postoperative care instructions for facelift surgery?  The postoperative care instructions for facelift surgery include:  Wearing a compression garment  Avoiding strenuous activity  Taking pain medication  Keeping the incisions clean and dry  What are the long-term results of facelift surgery?  The long-term results of facelift surgery can be very good. The surgery can help to improve the appearance of the face and neck for many years. However, it is important to note that facelift surgery is not a permanent solution. The effects of the surgery will eventually wear off, and the patient may need to have the surgery again in the future. |

2.7 Exams: Answer of multiple choice questions

Prompt: “Can you find the right answer?

1. A 62-year-old healthy woman comes to the office for her preoperative visit in preparation for her facelift surgery in 2 weeks. You explain the risks and benefits of the surgery, and she asks what the most common complication of a facelift is.

What do you answer?

a. Facial nerve injury

b. Skin necrosis

c. Seroma

d. Hematoma

e. Infection

2. A 59-year-old woman comes back to the office for follow-up

3 months after surgery. She is pleased with the aesthetic results but refers complete numbness of the left earlobe. Which nerve was most likely injured during the surgical procedure?

a. Posterior auricular nerve

b. Spinal accessory nerve

C. Cervical branch of the facial nerve

d. Great auricular nerve

e Mandibular branch of the facial nerve

Six months after a primary facelift with SMASectomy, a

3.70-year-old man comes back for follow-up. He was overweight and has lost 15 lb since surgery. Now he complains of midface hollowing, depressed temporal area and visible marionette lines. On examination, there is deflation of temples, midface, and perioral area with good tension on the skin. What is an appropriate option for improving this patient's concerns?

a. SMAS plication procedure

b. Chemical peels

c. Placement of cheek implants

d. Laser resurfacing

e. Fat grafting to the face”

| ChatGPT | Bard |
| --- | --- |
| The most common complication of a facelift is:  Answer: d. Hematoma    The nerve most likely injured during the surgical procedure resulting in complete numbness of the left earlobe is:  Answer: a. Posterior auricular nerve    An appropriate option for improving the patient's concerns of midface hollowing, depressed temporal area, and visible marionette lines after weight loss is:  Answer: e. Fat grafting to the face | The most common complication of a facelift is hematoma. It occurs in about 1-3% of cases. Hematoma is a collection of blood under the skin that can cause swelling, pain, and bruising. It can be serious if it is not treated promptly.  The most likely nerve injured during a facelift is the great auricular nerve. This nerve provides sensation to the earlobe. Injury to this nerve can cause numbness of the earlobe.  The appropriate option for improving this patient's concerns is fat grafting to the face. Fat grafting is a procedure in which fat is taken from one part of the body and transferred to another part. In this case, fat can be taken from the abdomen or thighs and transferred to the temples, midface, and perioral area. Fat grafting is a safe and effective procedure that can improve the appearance of the face.  Here are the answers to your questions:  (d) Hematoma  (d) Great auricular nerve  (e) Fat grafting to the face |
| Follow up prompt: “The answer to the second question is d. Great auricular nerve.” | N/A |
| ChatGPT | Bard |
| Apologies for the incorrect response. You are right, the most likely nerve injured during the surgical procedure resulting in complete numbness of the left earlobe is the great auricular nerve. Thank you for pointing out the error. | N/A |

2.8 Exams: Justify an answer

Prompt: “Can you explain the answer to the first question?”

| ChatGPT | Bard |
| --- | --- |
| Certainly! The most common complication of a facelift is a hematoma. A hematoma refers to the accumulation of blood under the skin or in the surgical area. It can occur as a result of bleeding from small blood vessels that were damaged during the surgery. Hematomas can cause swelling, pain, and may require drainage or surgical intervention to prevent complications such as infection or skin necrosis. While hematoma is the most common complication, it is important to note that the overall risk of complications in facelift surgery is relatively low when performed by a skilled and experienced surgeon. | Sure. Hematoma is the most common complication of a facelift. It occurs in about 1-3% of cases. Hematoma is a collection of blood under the skin that can cause swelling, pain, and bruising. It can be serious if it is not treated promptly.  There are a number of factors that can increase the risk of hematoma after a facelift, including:  Smoking  High blood pressure  Taking blood thinners  Having a history of bleeding disorders  Having a history of hematomas  If you are considering a facelift, it is important to discuss the risks and benefits of the procedure with your surgeon. You should also let your surgeon know about any medical conditions you have or any medications you are taking.  If you experience any swelling, pain, or bruising after your facelift, it is important to contact your surgeon immediately. He or she may be able to drain the hematoma and prevent further complications. |

2.9 Evaluation of surgical level

Prompt: “What level of surgery is required to do a facelift?”

| ChatGPT | Bard |
| --- | --- |
| A facelift, also known as rhytidectomy, is a surgical procedure that is typically performed by a plastic surgeon or a facial plastic surgeon. It is considered a moderately invasive surgical procedure and usually requires a certain level of expertise and training. Here's a general overview of the surgical process involved in a facelift:   1. Anesthesia: The surgery is performed under local anesthesia with sedation or general anesthesia, depending on the patient's needs and the extent of the facelift. 2. Incisions: The surgeon makes discreet incisions typically in front of and behind the ears, along the hairline. The exact incision pattern may vary based on the specific type of facelift and the patient's individual needs. 3. Tissue manipulation: The surgeon lifts and repositions the underlying facial tissues, including muscles and fat, to create a more youthful and rejuvenated appearance. Excess fat may be removed, and muscles may be tightened. 4. Excess skin removal: Excess skin is trimmed and re-draped to create a smoother and firmer look. 5. Incision closure: The incisions are closed with sutures, skin adhesives, or other methods, depending on the surgeon's preference and the patient's needs.   Facelifts are considered a more invasive cosmetic surgery procedure compared to non-surgical treatments like Botox, dermal fillers, or laser skin resurfacing. The level of surgery required can vary depending on the specific type of facelift, the extent of correction needed, and the surgical techniques used. Common types of facelifts include traditional facelifts, mini facelifts, mid-facelifts, and lower facelifts, each targeting different areas and levels of correction.  It's important to consult with a board-certified plastic surgeon to determine the most appropriate facelift procedure for your specific goals and to discuss the surgical approach, risks, and recovery associated with the chosen procedure. The surgeon's level of skill and experience is crucial in achieving the desired results and minimizing potential risks and complications. | A facelift is a major surgery. It is a complex procedure that requires a high level of surgical skill and experience. The surgeon must be able to carefully dissect the tissues of the face and neck, reposition the underlying muscles and tissues, and remove excess skin without damaging the delicate structures of the face.  Facelift surgery is typically performed under general anesthesia, but local anesthesia with sedation may be used in certain less extensive procedures. The surgeon will make incisions in the hairline at the temples, continuing around the ears and ending in the lower scalp. The skin is then separated from the underlying connective tissue and muscles. The surgeon will then reposition the deeper tissues beneath the skin and remove excess skin to smooth creases, eliminate jowling and sagging skin under the chin, and restore a naturally youthful contour to the face and neck.  Facelift surgery can be a very effective way to rejuvenate the appearance of the face and neck. However, it is important to remember that it is a major surgery with risks and potential complications. Patients should carefully consider their expectations and discuss the risks and benefits of the procedure with their surgeon before making a decision.  Here are some of the risks and potential complications of facelift surgery:   - Bleeding - Infection - Nerve damage - Bruising and swelling - Allergic reaction to anesthesia - Changes in skin sensation - Hair loss at the incision sites - Asymmetry of the face - Unsatisfactory results   Patients who are considering facelift surgery should consult with a board-certified plastic surgeon to discuss their individual needs and goals. The surgeon will be able to assess the patient's candidacy for surgery and explain the risks and benefits in more detail. |

**APPENDIX 3 - Patients**

3.1 Physiopathology

Prompt: “I am a patient, can you explain to me what are the risk factors that accelerate the aging of my face?”

| ChatGPT | Bard |
| --- | --- |
| As a patient, several risk factors can contribute to the accelerated aging of your face. While aging is a natural process, certain factors can expedite its effects. Here are some common risk factors:  Sun Exposure: Prolonged and unprotected exposure to the sun's ultraviolet (UV) rays is one of the primary causes of premature aging. It leads to the breakdown of collagen and elastin, which are essential proteins for maintaining skin elasticity. This can result in wrinkles, fine lines, age spots, and uneven skin tone.  Smoking: Smoking damages the blood vessels and reduces blood flow to the skin, depriving it of oxygen and essential nutrients. The toxins in cigarette smoke also contribute to the breakdown of collagen and elastin fibers, leading to premature wrinkling and sagging of the skin.  Poor Diet: A diet lacking in essential nutrients, particularly antioxidants, can accelerate aging. Antioxidants help protect the skin from oxidative stress caused by free radicals, which can damage cells and lead to signs of aging. A diet high in processed foods, sugar, and unhealthy fats may contribute to inflammation and skin damage.  Alcohol Consumption: Excessive alcohol consumption can dehydrate the body and deplete it of vital nutrients. It can also cause inflammation, which can accelerate the aging process. Alcohol can also interfere with sleep patterns, which can impact skin health and contribute to premature aging.  Stress: Chronic stress can have a detrimental impact on your overall health, including the health of your skin. It can lead to increased inflammation and the release of stress hormones, which can accelerate the aging process. Additionally, stress may lead to unhealthy coping mechanisms such as smoking or excessive alcohol consumption, further compounding the effects on the skin.  Lack of Sleep: Inadequate sleep can result in increased levels of stress hormones, leading to inflammation and a compromised skin barrier. It can also contribute to the formation of dark circles, puffy eyes, and a dull complexion.  Environmental Factors: Exposure to environmental pollutants, such as air pollution and toxins, can damage the skin and accelerate aging. These pollutants can generate free radicals that cause oxidative stress, leading to skin damage and premature aging.  Genetics: While you can't control your genetic makeup, certain genetic factors can influence the rate at which your skin ages. Some individuals may have inherited traits that make them more prone to premature aging or certain skin conditions.  While these risk factors can contribute to the accelerated aging of the face, adopting a healthy lifestyle, including proper sun protection, a balanced diet, regular exercise, stress management techniques, adequate sleep, and skincare habits, can help mitigate their effects and maintain healthier, more youthful-looking skin. If you have specific concerns about your skin or signs of premature aging, it is recommended to consult with a dermatologist for personalized advice and treatment options. | Sure. There are a number of risk factors that can accelerate the aging of your face. Some of the most common ones include:  Sun exposure: Ultraviolet (UV) rays from the sun can damage the collagen and elastin in your skin, leading to wrinkles, age spots, and other signs of premature aging.  Smoking: Smoking damages the collagen and elastin in your skin, as well as the blood vessels that supply your skin with oxygen and nutrients. This can lead to premature wrinkles, age spots, and a loss of skin elasticity.  Alcohol consumption: Excessive alcohol consumption can dehydrate your skin and make it more prone to damage from the sun and other environmental factors. This can lead to premature wrinkles, age spots, and a loss of skin elasticity.  Poor diet: A diet that is high in sugar, processed foods, and unhealthy fats can contribute to premature aging. These foods can damage the collagen and elastin in your skin, as well as increase your risk of developing chronic diseases such as heart disease and diabetes.  Stress: Stress can accelerate the aging process by increasing inflammation in your body. Inflammation can damage the collagen and elastin in your skin, as well as contribute to the development of wrinkles and age spots.  Genetics: Some people are simply more prone to premature aging than others. This is often due to genetics.  There are a number of things you can do to reduce your risk of premature aging, including:  Wear sunscreen every day: Sunscreen is the single most important thing you can do to protect your skin from the sun's harmful UV rays. Apply a broad-spectrum sunscreen with an SPF of 30 or higher to all exposed skin every day, even on cloudy days.  Quit smoking: Quitting smoking is one of the best things you can do for your overall health, and it can also help to improve the appearance of your skin.  Limit alcohol consumption: Excessive alcohol consumption can damage your skin, so it's best to limit your intake.  Eat a healthy diet: A healthy diet that is rich in fruits, vegetables, and whole grains can help to keep your skin looking its best.  Manage stress: Stress can accelerate the aging process, so it's important to find healthy ways to manage stress. Exercise, yoga, and meditation are all great ways to reduce stress.  Get enough sleep: Sleep is essential for overall health, and it can also help to improve the appearance of your skin. Aim for 7-8 hours of sleep each night.  If you are concerned about the appearance of your skin, you can talk to your doctor or a dermatologist about treatment options. There are a number of treatments available that can help to reduce the appearance of wrinkles, age spots, and other signs of premature aging. |

3.2 Questions about surgical techniques

Prompt: “Can you explain to me in simple language what a deep plane lift is?”

| ChatGPT | Bard |
| --- | --- |
| Certainly! In simple terms, a deep plane facelift is a surgical technique used to lift and rejuvenate the face by addressing the deeper layers of facial tissues.  During a deep plane facelift, the surgeon makes incisions typically around the hairline, ears, and sometimes under the chin. Through these incisions, they access the deeper layers of the face. Unlike some other facelift techniques that primarily lift the skin, the deep plane facelift involves repositioning and tightening the underlying muscles and tissues.  The deep plane technique allows the surgeon to lift and reposition the deeper layers of the face, including the muscles and fat pads, to create a more natural and long-lasting result. By addressing these deeper structures, the procedure aims to restore volume, lift sagging tissues, and improve overall facial contour.  The term "deep plane" refers to the specific layer of tissues being treated during the surgery, which is deeper than the superficial layers of the skin. The technique requires a higher level of surgical expertise and is typically performed by experienced plastic surgeons who specialize in facial rejuvenation procedures.  It's important to note that while the deep plane facelift is a more advanced technique, not all patients will require or be suitable candidates for this approach. The specific surgical plan will depend on factors such as individual anatomy, desired outcomes, and the surgeon's assessment.  It's always recommended to consult with a qualified plastic surgeon who can provide you with a thorough explanation of the deep plane facelift technique, assess your unique needs, and determine the most appropriate approach for achieving your desired results. | Sure. A deep plane facelift is a type of facelift that goes deeper than other facelifts. It lifts the deeper tissues of the face, including the muscles and fat, which can help to create a more natural-looking and long-lasting result.  A deep plane facelift is performed under general anesthesia. The surgeon makes incisions in the scalp, behind the ears, and in front of the ears. They then lift the skin and underlying tissues to access the deeper structures of the face. The surgeon then releases the ligaments that hold the tissues in place and lifts them into a more youthful position. The skin is then redraped and sutured in place.  A deep plane facelift can take several hours to perform. Recovery time is typically two to three weeks. During recovery, patients may experience swelling, bruising, and pain. They may also need to wear a compression garment.  Deep plane facelifts are typically more expensive than other facelifts. However, they can offer a more natural-looking and long-lasting result.  Here are some of the benefits of a deep plane facelift:  It can help to lift the deeper tissues of the face, including the muscles and fat, which can create a more natural-looking and long-lasting result.  It can help to reduce the appearance of jowls, neck creases, and deep wrinkles.  It can help to restore a more youthful and refreshed appearance to the face.  Here are some of the risks of a deep plane facelift:  It is a surgical procedure, so there is always the risk of complications, such as infection, bleeding, and scarring.  It can be a more expensive procedure than other types of facelifts.  It can take longer to recover from a deep plane facelift than from other types of facelifts.  If you are considering a deep plane facelift, it is important to talk to your doctor about the risks and benefits of the procedure. They can help you to decide if a deep plane facelift is right for you. |

3.3 Outline complications of a surgery

Prompt: “What is the percentage of facial nerve damage during a face lift?”

| ChatGPT | Bard |
| --- | --- |
| The percentage of facial nerve damage during a facelift procedure can vary depending on several factors, including the surgeon's experience and skill, the specific technique used, and the individual patient's anatomy. It's important to note that facial nerve damage is a potential complication of any surgical procedure involving the face, including facelifts.  Facial nerve damage can manifest in various ways, ranging from temporary weakness or numbness to more severe and long-lasting effects. However, significant facial nerve damage is considered a rare complication of facelift surgery, especially when performed by a qualified and experienced surgeon.  The reported incidence of facial nerve injury during facelift surgery varies in different studies. While exact percentages may differ, research generally suggests that the risk of permanent facial nerve damage during a facelift is relatively low, typically less than 1%. Temporary or mild nerve-related symptoms, such as numbness, weakness, or altered sensation, may occur more frequently but are usually transient and resolve over time.  It's crucial to discuss the potential risks and complications of facelift surgery with your plastic surgeon before undergoing the procedure. They can provide you with more specific information based on your individual circumstances and help you understand the measures they take to minimize the risk of nerve damage during the surgery. Choosing a skilled and board-certified plastic surgeon who specializes in facial procedures can further enhance the safety and success of your facelift. | The percentage of facial nerve damage during a facelift is very low. It is estimated that only 1-2% of facelifts result in any type of nerve damage. The most common type of nerve damage is temporary numbness in the face, which usually resolves within a few weeks. More serious nerve damage, such as paralysis of the face, is much less common and occurs in less than 0.1% of facelifts.  There are a number of factors that can increase the risk of facial nerve damage during a facelift, including:  The complexity of the surgery  The skill of the surgeon  The patient's age  The patient's overall health  If you are considering a facelift, it is important to talk to your surgeon about the risks of nerve damage. You should also ask your surgeon about their experience with facelifts and their technique for minimizing the risk of nerve damage.  Here are some tips to help you reduce your risk of facial nerve damage during a facelift:  Choose a board-certified plastic surgeon who has experience performing facelifts.  Ask your surgeon about their technique for minimizing the risk of nerve damage.  Be sure to discuss your overall health with your surgeon before undergoing any surgery.  If you experience any numbness or weakness in your face after a facelift, be sure to contact your surgeon right away. |

3.4 Present the contraindications of a surgical intervention

Prompt: “What diseases are a contraindication to a facelift and why?”

| ChatGPT | Bard |
| --- | --- |
| There are certain medical conditions or diseases that can be considered contraindications to facelift surgery. A contraindication means that undergoing a facelift may not be advisable or safe for individuals with these conditions due to the potential risks involved. Here are some examples:  Uncontrolled or Severe Systemic Diseases: Conditions such as uncontrolled diabetes, severe cardiovascular disease, severe respiratory disease, or autoimmune diseases may be contraindications to facelift surgery. These conditions can increase the risks associated with anesthesia and surgical procedures, as well as impair wound healing.  Bleeding Disorders: Patients with bleeding disorders, such as hemophilia or those taking anticoagulant medications that affect blood clotting, may have an increased risk of bleeding during and after surgery. This can negatively impact the healing process and increase the risk of complications.  Active Infections: Facelift surgery should generally be avoided if a patient has an active infection in the face or surrounding areas. Surgery in the presence of infection can lead to a higher risk of complications, including delayed wound healing, poor scarring, and increased risk of infection spreading.  Severe Skin Diseases or Conditions: Patients with severe skin diseases or conditions that affect the face, such as active dermatitis, eczema, psoriasis, or skin infections, may not be suitable candidates for facelift surgery. These conditions can compromise wound healing, increase the risk of infection, and potentially worsen the skin condition.  Unrealistic Expectations or Psychological Concerns: Psychological factors, such as unrealistic expectations, body dysmorphia, or significant psychological distress, should be considered before proceeding with any cosmetic procedure. It's important for patients to have a clear understanding of what can be achieved with a facelift and have reasonable expectations regarding the outcome.  It's crucial to have a comprehensive evaluation by a qualified plastic surgeon to determine if you are a suitable candidate for facelift surgery. The surgeon will assess your medical history, perform a physical examination, and consider various factors to determine if the procedure is safe and appropriate for you. | There are a number of diseases that can be considered contraindications to a facelift. These include:  Active infections: Any active infection, such as a cold or the flu, can increase the risk of infection after surgery.  Uncontrolled medical conditions: Any medical condition that is not well-controlled, such as high blood pressure, diabetes, or heart disease, can increase the risk of complications during and after surgery.  Allergies: If you have any allergies, be sure to tell your surgeon before surgery. Some of the medications used during and after surgery can trigger an allergic reaction.  Smoking: Smoking can increase the risk of complications after surgery, such as bleeding, infection, and poor wound healing. It is important to quit smoking at least two weeks before surgery.  Mental health conditions: If you have any mental health conditions, such as anxiety or depression, be sure to tell your surgeon before surgery. These conditions can make it difficult to cope with the stress of surgery and the recovery process.  If you have any of these conditions, you may not be a good candidate for a facelift. Be sure to talk to your surgeon about your specific health concerns before making a decision about surgery.  Here are some additional reasons why a facelift may be contraindicated:  Unrealistic expectations: It is important to have realistic expectations about what a facelift can achieve. A facelift cannot stop the aging process, and it cannot completely erase wrinkles and age spots.  Inability to afford the surgery: Facelifts can be expensive, and it is important to be able to afford the cost of surgery, as well as the cost of follow-up care.  Lack of support: It is important to have someone to help you care for yourself after surgery. This person can help you with things like bathing, dressing, and cooking.  If you are considering a facelift, it is important to talk to your doctor about your overall health and your expectations for surgery. Your doctor can help you decide if a facelift is right for you. |

3.5 Visual rendering of a surgery

Prompt: “Can you draw me the incisions for a facelift?”

| ChatGPT | Bard |
| --- | --- |
| I'm sorry, but as a text-based AI model, I'm unable to directly provide visual content like drawings. However, I can describe the general incision patterns commonly used in facelift surgery. It's important to note that specific incision techniques may vary based on the surgeon's preferences and the patient's individual needs. It's best to consult with a qualified plastic surgeon for a detailed explanation and to see visual representations of the incisions.  Here is a description of the typical incisions used in a traditional facelift:  Traditional Facelift Incisions:  Temporal Incisions: These incisions are typically made within the hairline, above the ear, and extend into the natural creases or hairline behind the ear.  Preauricular Incisions: These incisions start in front of the ear and follow the natural crease, continuing behind the earlobe or into the hairline.  Postauricular Incisions: These incisions are made behind the ear, within the hairline, and may extend into the scalp.  Submental Incision: In some cases, a small incision may be made under the chin to address sagging in the neck area.  It's important to note that advancements in surgical techniques have introduced variations, such as minimally invasive facelifts or short scar facelifts, which involve shorter incisions or modified incision placements. These techniques are often used in specific cases where the patient's concerns are primarily focused on certain areas of the face or when they desire less extensive surgery.  To gain a clearer understanding of the incisions and the specific surgical plan for your facelift, I recommend scheduling a consultation with a board-certified plastic surgeon. They will assess your specific needs and provide you with detailed information and visuals tailored to your situation. | I am a large language model, also known as a conversational AI or chatbot trained to be informative and comprehensive. I am trained on a massive amount of text data, and I am able to communicate and generate human-like text in response to a wide range of prompts and questions. For example, I can provide summaries of factual topics or create stories.  However, I am not able to generate images. |

3.6 Suggesting references of surgical drawings

Prompt: “Can you give me a reference to a website where I can see a drawing of the incisions of a facelift?”

| ChatGPT | Bard |
| --- | --- |
| I apologize for the inconvenience, but as an AI text-based model, I don't have browsing capabilities to provide specific website references or direct links. However, you can try conducting an online search using relevant keywords such as "facelift incision patterns" or "facelift surgery diagrams" to find websites, medical resources, or educational materials that provide visual representations of facelift incisions.  Several reputable plastic surgery associations and organizations often have resources or patient education sections on their websites that may include illustrations or diagrams of facelift incisions. Examples of such organizations include the American Society of Plastic Surgeons (ASPS) and the American Society for Aesthetic Plastic Surgery (ASAPS).  It's always recommended to consult with a qualified plastic surgeon who can provide personalized information and show you specific visual materials during an in-person consultation. They can explain the incision techniques relevant to your individual case and address any concerns or questions you may have. | I'm unable to help, as I am only a language model and don't have the ability to process and understand that. |

3.7 Provide medical advice

Prompt: “My scar is red and painful, should I consult my surgeon?”

| ChatGPT | Bard |
| --- | --- |
| Yes, if you have a red and painful scar following your facelift surgery, it is recommended that you consult with your surgeon. While some degree of redness and mild discomfort can be normal in the early stages of healing, persistent or worsening redness and pain may indicate a potential issue that requires medical attention.  Your surgeon will be able to assess the scar and determine the underlying cause of the symptoms. It could be related to factors such as infection, inflammation, or delayed healing. Prompt evaluation by your surgeon will help identify any complications and allow for appropriate treatment to be initiated if necessary.  It's important not to ignore any concerning signs or symptoms, as early intervention can help prevent further complications and optimize the healing process. Contact your surgeon's office to schedule a follow-up appointment and discuss your symptoms with them as soon as possible. They will be in the best position to provide you with specific guidance and address any concerns you may have. | Yes, you should consult your surgeon if your scar is red and painful. It is possible that the scar is infected, and your surgeon will be able to provide the appropriate treatment. In some cases, a red and painful scar may be a sign of a more serious complication, such as a keloid. Your surgeon will be able to assess the scar and determine the best course of treatment.  Here are some of the possible causes of a red and painful scar:  Infection: An infection can cause redness, swelling, pain, and warmth at the incision site. If you think your scar may be infected, it is important to see your doctor right away.  Keloid: A keloid is a type of scar that grows larger than the original wound. Keloids can be red, raised, and painful. If you have a keloid, your doctor may recommend treatment options such as surgery, steroid injections, or laser therapy.  Hypertrophic scar: A hypertrophic scar is another type of raised scar. Hypertrophic scars are usually not as large as keloids, and they may fade over time. However, if your hypertrophic scar is causing pain or discomfort, you may want to talk to your doctor about treatment options.  Allergic reaction: In rare cases, a scar may become red and painful due to an allergic reaction to the sutures or dressings used during surgery. If you think you may be having an allergic reaction, it is important to see your doctor right away.  If you are concerned about your scar, it is always best to consult with your surgeon. They will be able to assess the scar and determine the best course of treatment. |

3.8 Provide medical advice and opinion

Prompt: “ Is it serious?

| ChatGPT | Bard |
| --- | --- |
| While I am an AI language model and cannot provide a definitive medical diagnosis, a red and painful scar following a facelift can indicate a potential issue that should be evaluated by your surgeon. It's important not to ignore these symptoms, as they could be indicative of a more serious problem.    There are several potential causes for a red and painful scar, including infection, inflammation, or poor wound healing. Infections can cause increased redness, warmth, tenderness, and pain at the site of the scar. Delayed wound healing or other complications may also result in persistent redness and discomfort.    Only a qualified medical professional, such as your surgeon, can properly assess the severity and determine the appropriate course of action. They will examine the scar, consider your specific circumstances, and potentially conduct further tests or investigations if necessary.    If you are experiencing concerning symptoms, it is advisable to reach out to your surgeon and schedule an appointment to have the scar evaluated. They will be able to provide a more accurate assessment of the situation and guide you on the appropriate steps to take.    Remember, seeking professional medical advice from your surgeon is crucial in determining the seriousness of the situation and ensuring proper care and treatment. | It is difficult to say whether or not your scar is serious without knowing more about your medical history and the specific circumstances of your surgery. However, in general, a red and painful scar is not a cause for immediate alarm. Most scars will go through a period of redness and pain during the healing process. If your scar is not improving after a few weeks, or if it is causing you significant pain or discomfort, then you should see your surgeon to rule out any underlying complications.    Here are some of the factors that can increase the risk of a serious scar:    The location of the scar. Scars on areas of the body that are more prone to movement, such as the face, are more likely to become raised and painful.  The severity of the injury. Scars from more severe injuries are more likely to become raised and painful.  The patient's age. Children are more likely to develop keloids than adults.  The patient's ethnicity. African Americans, Hispanics, and Asians are more likely to develop keloids than Caucasians.  A family history of keloids.  If you are concerned about your scar, it is always best to consult with your surgeon. They will be able to assess the scar and determine the best course of treatment. |

3.9 Provide postoperative care advice

Prompt: “I had a face lift 5 days ago, can I wash my hair?”

| ChatGPT | Bard |
| --- | --- |
| It is generally advisable to follow the post-operative care instructions provided by your surgeon, as they will have specific guidelines tailored to your individual case. However, as a general guideline, it is usually safe to wash your hair around 5 days after a facelift, but it's important to do so with caution and gentle care to avoid disrupting the healing incisions.    Here are some tips to keep in mind when washing your hair after a facelift:    Consult with your surgeon: Before proceeding with any hair washing or other activities, it's best to consult with your surgeon to ensure it is appropriate based on your specific healing progress and any unique considerations.    Avoid direct pressure on the incisions: Be cautious not to apply direct pressure or scrub vigorously on the incision sites. Gently cleanse the surrounding areas and avoid excessive pulling or stretching of the skin.    Use mild, non-irritating products: Opt for gentle and non-irritating shampoos and conditioners. Avoid products containing harsh chemicals or strong fragrances that could potentially irritate the incision areas.    Pat dry: After washing your hair, pat it dry with a soft towel instead of rubbing, as rubbing can cause friction and potentially disrupt the incisions.    Follow any additional instructions: Your surgeon may provide specific instructions for your post-operative care, such as using a special shampoo or avoiding certain hair treatments. Make sure to follow these guidelines carefully.    Remember, it's important to prioritize proper wound care and follow your surgeon's recommendations for a smooth healing process. If you have any concerns or questions regarding hair washing or your recovery in general, it's always best to reach out to your surgeon for guidance. | No, you should not wash your hair 5 days after a facelift. It is important to allow your incisions to heal completely before washing your hair. Washing your hair too soon can irritate your incisions and increase the risk of infection.    You can gently clean your scalp with a damp washcloth. You can also use a spray bottle to wet your hair and apply a mild shampoo. Be sure to avoid getting the shampoo on your incisions.    You should wait until at least 1 week after your facelift to wash your hair in the shower. When you are ready to wash your hair, be sure to follow your surgeon's instructions carefully.    Here are some tips for washing your hair after a facelift:    Use a mild shampoo and conditioner.  Wash your hair with lukewarm water.  Avoid getting shampoo on your incisions.  Gently massage your scalp.  Rinse your hair thoroughly.  Dry your hair with a towel.  Avoid using a hair dryer.  If you have any questions or concerns about washing your hair after a facelift, be sure to talk to your surgeon. |
